# Supplementary material
Source: PubMed Central journal article supplement (PMC4040535)
Supplement: NIHMS572447-supplement-01.pdf [file NIHMS572447-supplement-01.pdf]

**Supplemental information for ‘Characterization of  
the Water Defect at the HIV-1 gp41 Membrane  
Spanning Domain in Bilayers With and Without  
Cholesterol using Molecular Simulations’**

Michelle K. Baker,<sup>†</sup> Vamshi K. Gangupomu,<sup>‡</sup> and Cameron F. Abrams<sup>\*,†</sup>

*Department of Chemical and Biological Engineering, Drexel University, Philadelphia,  
Pennsylvania, and A & J Consulting Engineering Services P.C., Clifton, New Jersey*

E-mail: cfa22@drexel.edu

---

\*To whom correspondence should be addressed

<sup>†</sup>Drexel University

<sup>‡</sup>A & J Consulting Engineering Services P.C.

# List of Figures

|   |                                                                                                                                                                                                                                                                                                                                                                                                                                                                                                                                                                                                                                                                                      |   |
|---|--------------------------------------------------------------------------------------------------------------------------------------------------------------------------------------------------------------------------------------------------------------------------------------------------------------------------------------------------------------------------------------------------------------------------------------------------------------------------------------------------------------------------------------------------------------------------------------------------------------------------------------------------------------------------------------|---|
| 1 | Comparison of WT systems run with more aggressive (WT1) and less aggressive (WT1c) configuration parameters (see Methods). (A) Collective variable (RMSD of backbone compared to perfect helix) in Å vs simulation time in ns and histogram of RMSD vs frequency for equilibrium MD of WT1c. Compare to Figure 2A for WT1. (B) Number of water molecules within 4 Å of protein vs amino acid that each water molecule is uniquely attributed to during equilibrium MD for WT1 and WT1c systems. All statistics are from the last 100 ns of each trajectory and error bars represent standard deviation. (C) Tilt angle in degrees vs simulation time in ns for WT1 and WT1c systems. | 4 |
| 2 | (A,B,D, and F) Global mass density in $\text{amu}/\text{Å}^3$ along membrane normal in Å during equilibrium MD for various components: lipid tails, lipid headgroups, water, and cholesterol for DPPC, DPPC/Chol, R694LR, and WT1c systems. (C, and E) Local mass density in $10^2 \text{amu}/\text{Å}^3$ along membrane normal in Å during equilibrium MD for various components: protein, local water (defined as within 4 Å of protein), and midspan arginine for R694LR and WT1c systems. All statistics are from the last 100 ns of each trajectory.                                                                                                                            | 5 |
| 3 | Sn1 order parameters <sup>1</sup> vs carbon atom index from last 100 ns of trajectory.                                                                                                                                                                                                                                                                                                                                                                                                                                                                                                                                                                                               | 6 |
| 4 | Local mass density (within 6 Å of protein) in $\text{amu}/\text{Å}^3$ along membrane normal in Å during equilibrium MD of lipid tails, lipid headgroups, and cholesterol for (A) WT1, (B) WT2, and (C) WT3 systems. All statistics are from the full 300 ns of each trajectory.                                                                                                                                                                                                                                                                                                                                                                                                      | 7 |
| 5 | Convergence of cumulative PMFs for R694L peptide metadynamics. Conformational potential of mean force (PMF) in kcal/mol vs collective variable (RMSD of backbone compared to perfect helix) in Å during (A) 280 to 300 ns and (B) 300 to 320 ns.                                                                                                                                                                                                                                                                                                                                                                                                                                     | 8 |
| 6 | Collective variable (RMSD of backbone compared to perfect helix) in Å vs simulation time in ns for R694L peptide metadynamics. As insets are snapshots from along the R694L peptide metadynamics trajectory rendered in VMD <sup>2</sup> (R694L peptide in cyan new cartoon and R694L residue in cyan vdW).                                                                                                                                                                                                                                                                                                                                                                          | 9 |

|   |                                                                                                                                                                                                                                                                                                                                                                                                                                                                                                                                                    |    |
|---|----------------------------------------------------------------------------------------------------------------------------------------------------------------------------------------------------------------------------------------------------------------------------------------------------------------------------------------------------------------------------------------------------------------------------------------------------------------------------------------------------------------------------------------------------|----|
| 7 | <p>Maps of membrane thickness, <math>L</math>, (left column) in Å and standard deviation, <math>\sigma_L</math>, (right column) in Å for the WT2, WT3, WT1c, R694LR, DPPC/Chol, WT2ΔChol, and DPPC systems from equilibrium MD. Overlaid on the maps are the <math>x</math> and <math>y</math> positions of the non-hydrogen atoms of the peptide (black circles) and the 694 residue (white circles) from the last frame of the trajectory. The N- and C-termini are labeled. Statistics are from the last 100 ns of each trajectory. . . . .</p> | 10 |
| 8 | <p>Maps of average minimum distance of water molecules along membrane normal in inner leaflet from global center of mass of lipid bilayer, <math>\text{Min}</math> (left column), in Å and standard deviation, <math>\sigma_{\text{Min}}</math>, (right column) in Å for WT2, WT3, WT1c, R694LR, R694L, DPPC/Chol, WT2ΔChol, and DPPC systems. All statistics are from the last 100 ns of each trajectory. . . . .</p>                                                                                                                             | 11 |

## References

(1) Vermeer, L. S.; de Groot, B. L.; Réat, V.; Milon, A.; Czaplicki, J. Acyl Chain Order Parameter Profiles in Phospholipid Bilayers: Computation from Molecular Dynamics Simulations and Comparison with  $^2\text{H}$  NMR Experiments. *Eur. Biophys. J.* **2007**, *36*, 919–31.

(2) Humphrey, W.; Dalke, A.; Schulten, K. VMD: Visual Molecular Dynamics. *J. Mol. Graphics* **1996**, *14*, 33–38, 27–28.

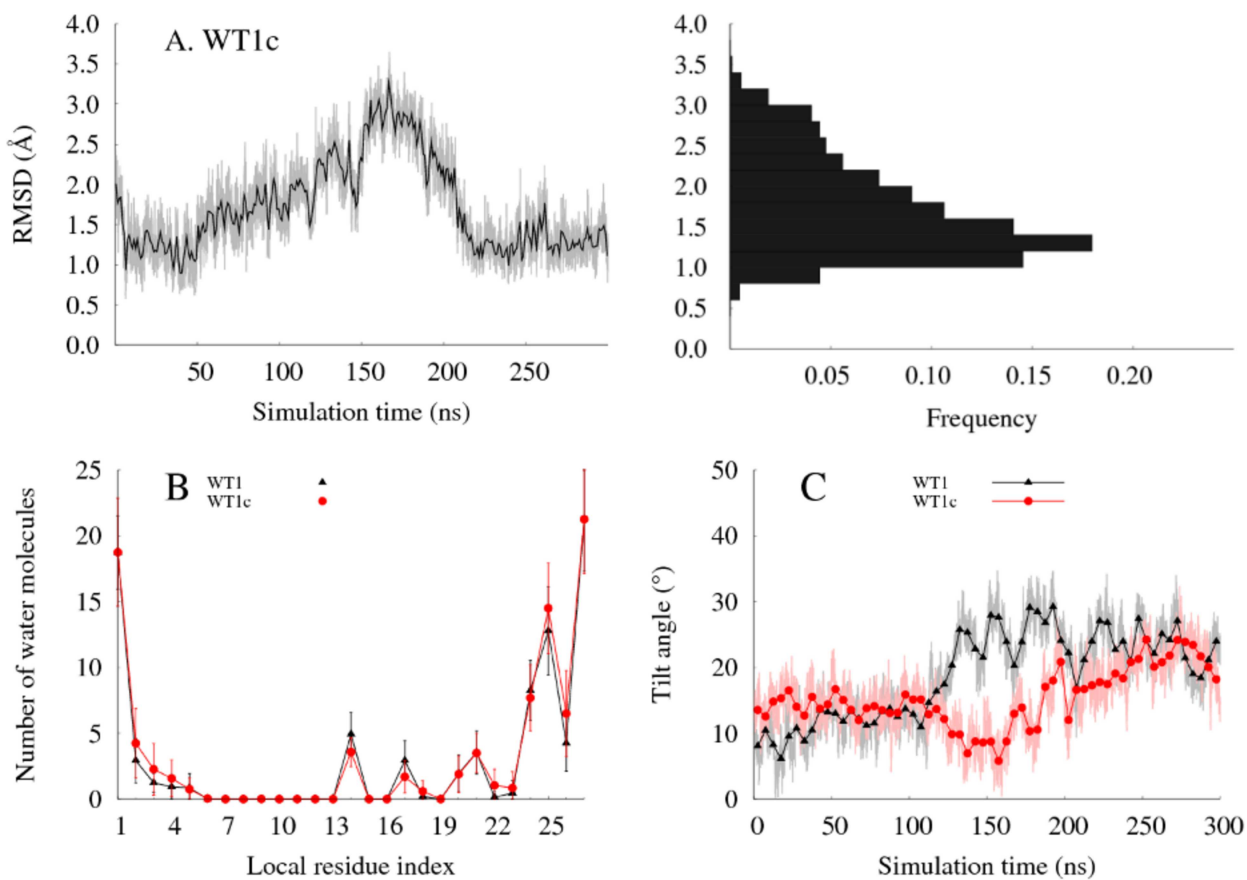

Figure 1: Comparison of WT systems run with more aggressive (WT1) and less aggressive (WT1c) configuration parameters (see Methods). (A) Collective variable (RMSD of backbone compared to perfect helix) in Å vs simulation time in ns and histogram of RMSD vs frequency for equilibrium MD of WT1c. Compare to Figure 2A for WT1. (B) Number of water molecules within 4 Å of protein vs amino acid that each water molecule is uniquely attributed to during equilibrium MD for WT1 and WT1c systems. All statistics are from the last 100 ns of each trajectory and error bars represent standard deviation. (C) Tilt angle in degrees vs simulation time in ns for WT1 and WT1c systems.

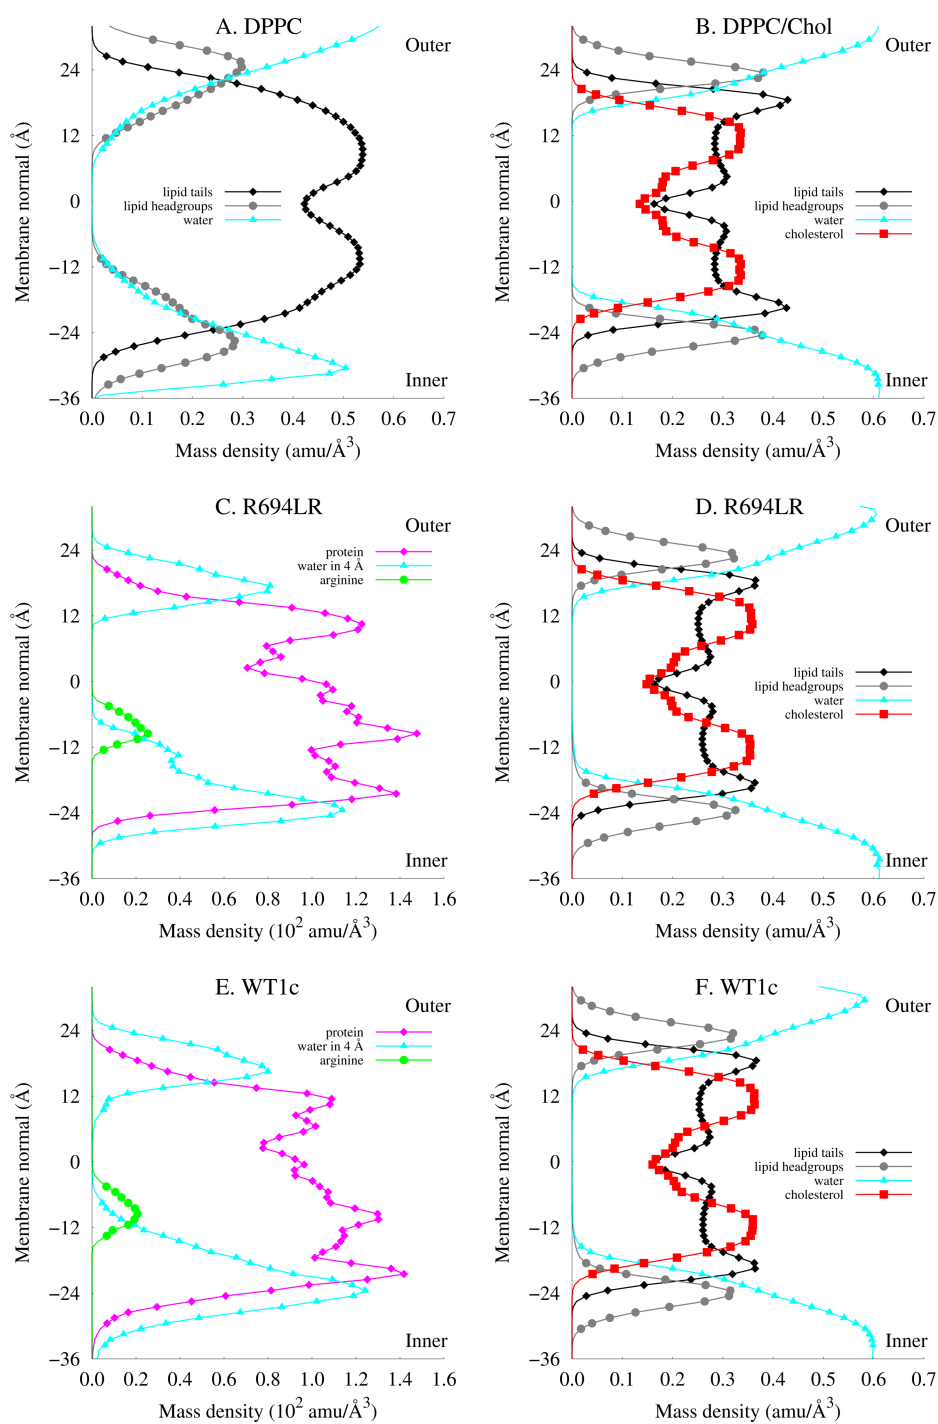

Figure 2: (A,B,D, and F) Global mass density in  $\text{amu}/\text{\AA}^3$  along membrane normal in  $\text{\AA}$  during equilibrium MD for various components: lipid tails, lipid headgroups, water, and cholesterol for DPPC, DPPC/Chol, R694LR, and WT1c systems. (C, and E) Local mass density in  $10^2 \text{ amu}/\text{\AA}^3$  along membrane normal in  $\text{\AA}$  during equilibrium MD for various components: protein, local water (defined as within 4  $\text{\AA}$  of protein), and midspan arginine for R694LR and WT1c systems. All statistics are from the last 100 ns of each trajectory.

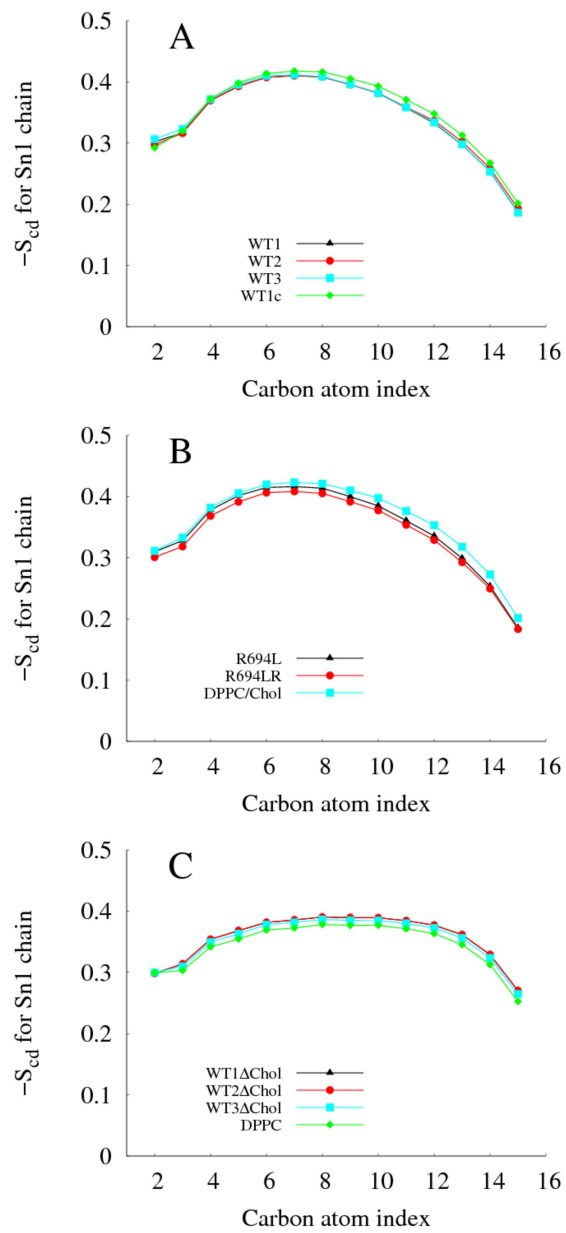

Figure 3: Sn1 order parameters<sup>1</sup> vs carbon atom index from last 100 ns of trajectory.

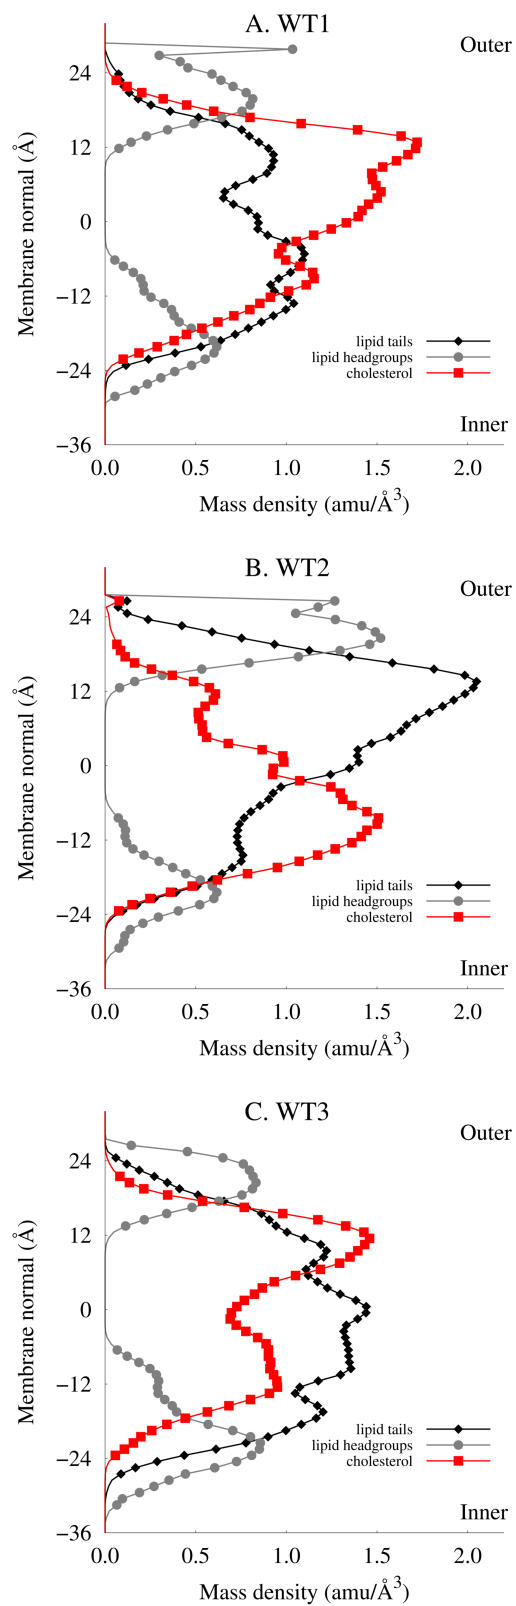

Figure 4: Local mass density (within 6 Å of protein) in  $\text{amu}/\text{\AA}^3$  along membrane normal in Å during equilibrium MD of lipid tails, lipid headgroups, and cholesterol for (A) WT1, (B) WT2, and (C) WT3 systems. All statistics are from the full 300 ns of each trajectory.

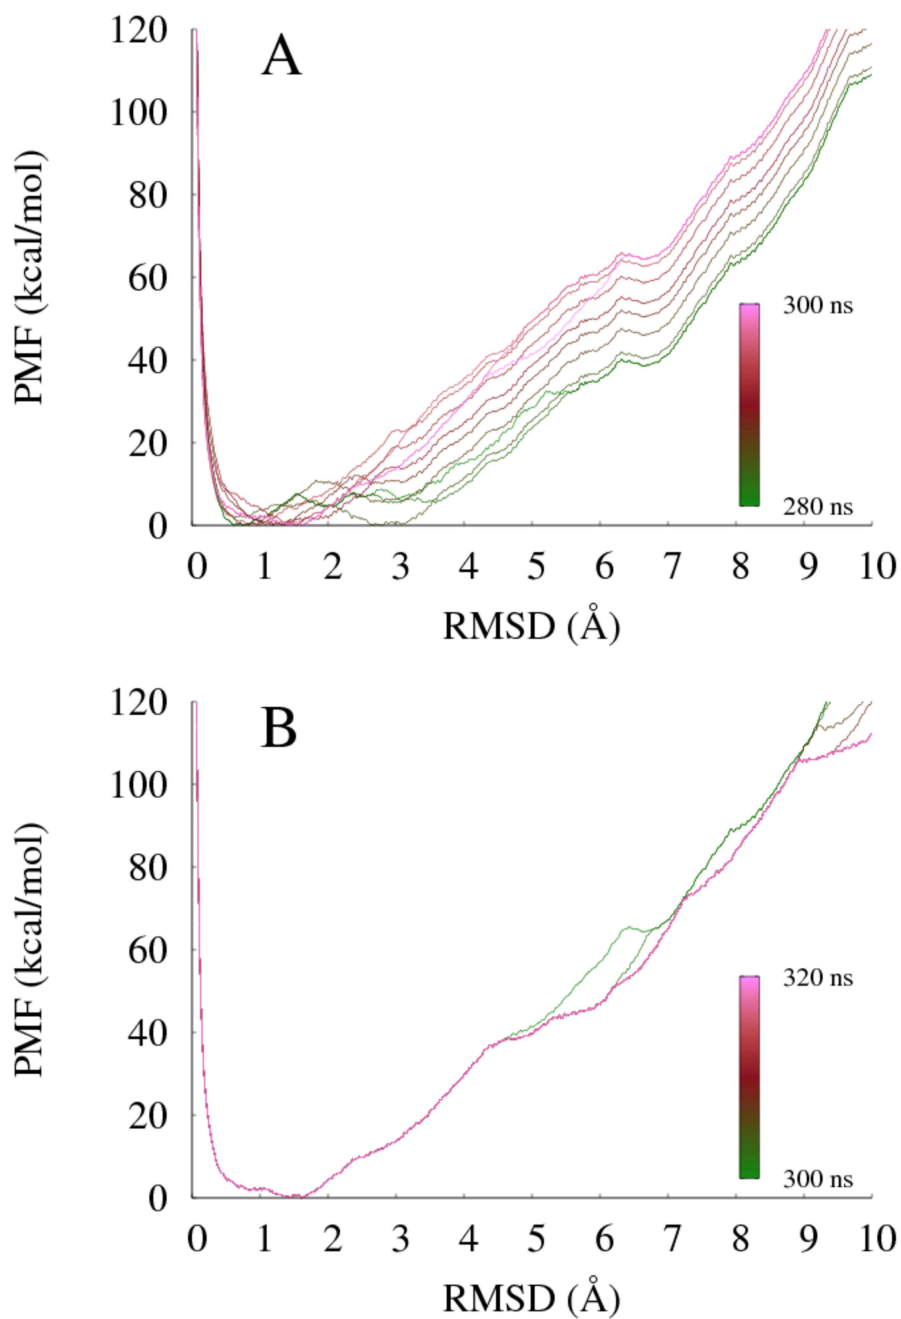

Figure 5: Convergence of cumulative PMFs for R694L peptide metadynamics. Conformational potential of mean force (PMF) in kcal/mol vs collective variable (RMSD of backbone compared to perfect helix) in Å during (A) 280 to 300 ns and (B) 300 to 320 ns.



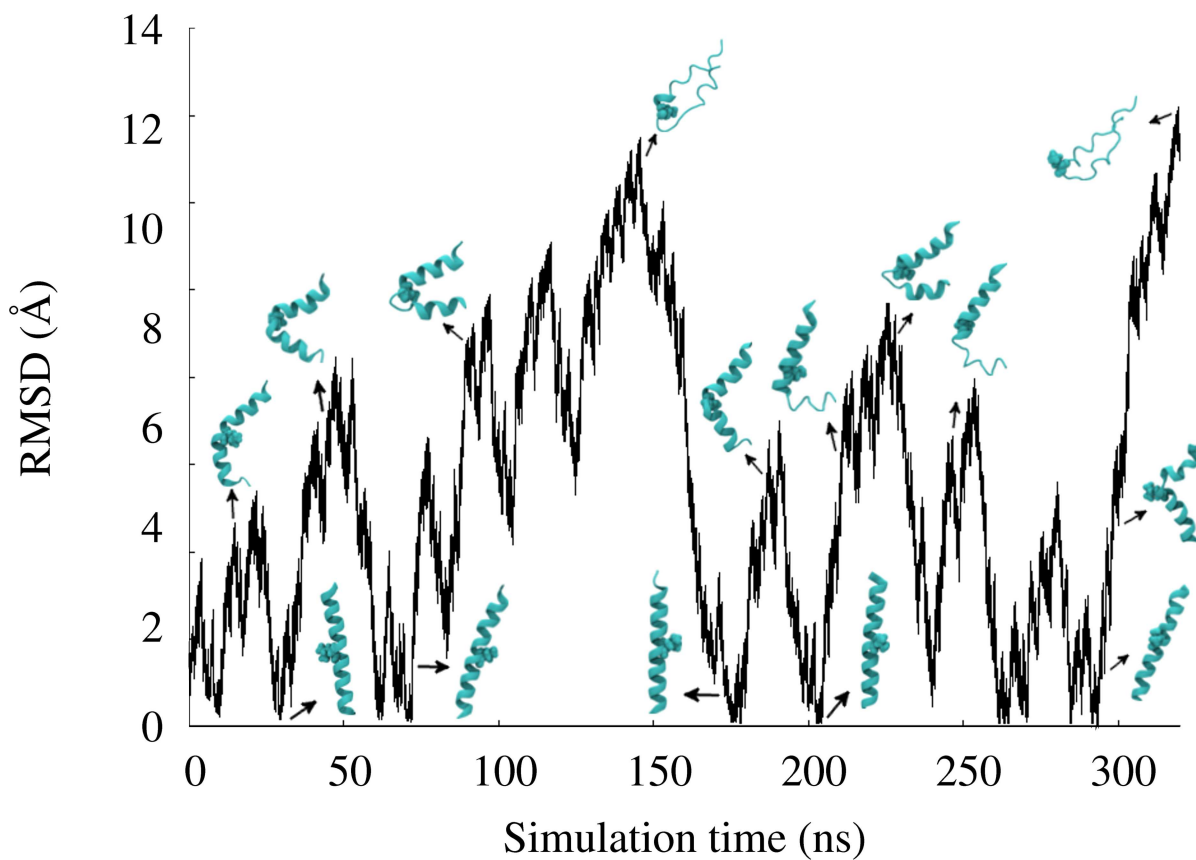

Figure 6: Collective variable (RMSD of backbone compared to perfect helix) in Å vs simulation time in ns for R694L peptide metadynamics. As insets are snapshots from along the R694L peptide metadynamics trajectory rendered in VMD<sup>2</sup> (R694L peptide in cyan new cartoon and R694L residue in cyan vdW).

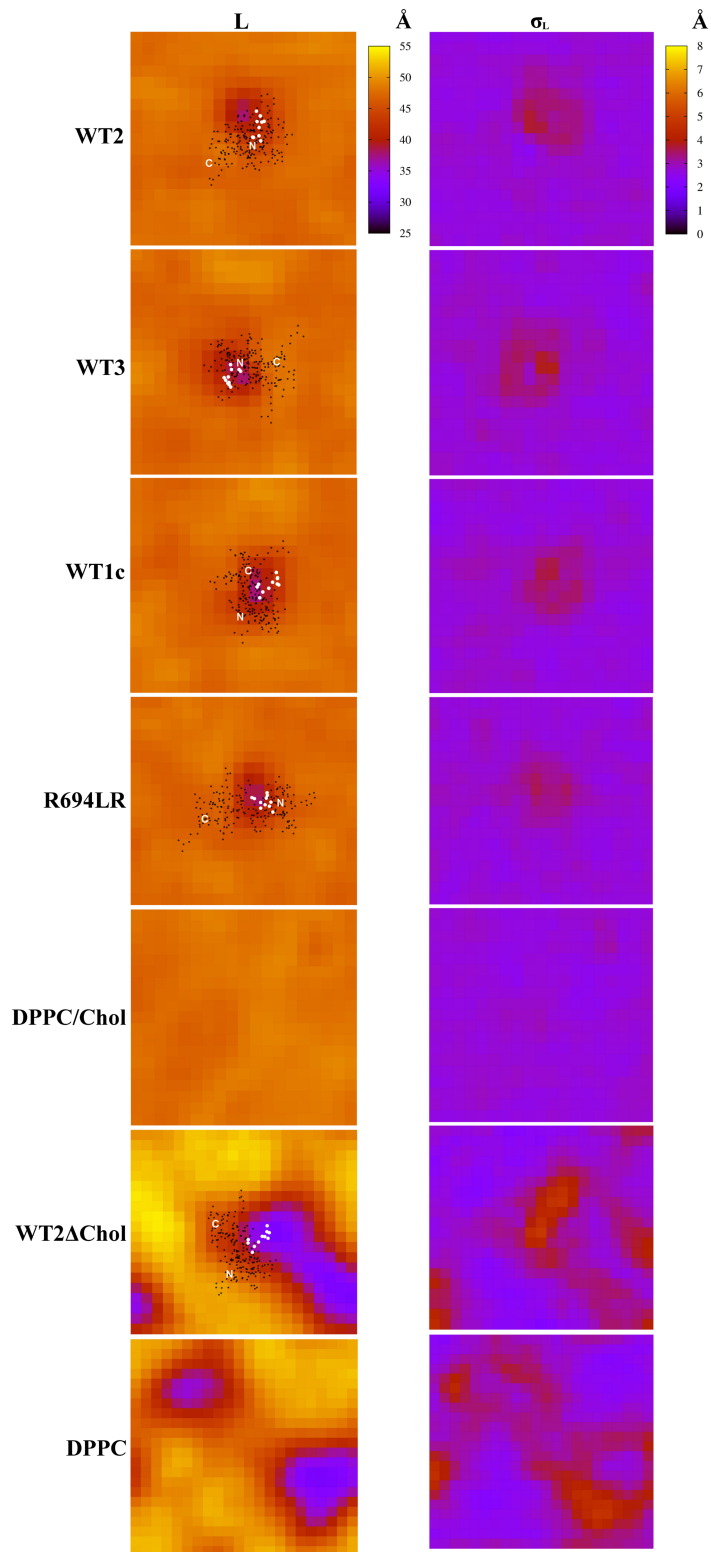

Figure 7: Maps of membrane thickness,  $L$ , (left column) in Å and standard deviation,  $\sigma_L$ , (right column) in Å for the WT2, WT3, WT1c, R694LR, DPPC/Chol, WT2ΔChol, and DPPC systems from equilibrium MD. Overlaid on the maps are the  $x$  and  $y$  positions of the non-hydrogen atoms of the peptide (black circles) and the 694 residue (white circles) from the last frame of the trajectory. The N- and C- termini are labeled. Statistics are from the last 100 ns of each trajectory.

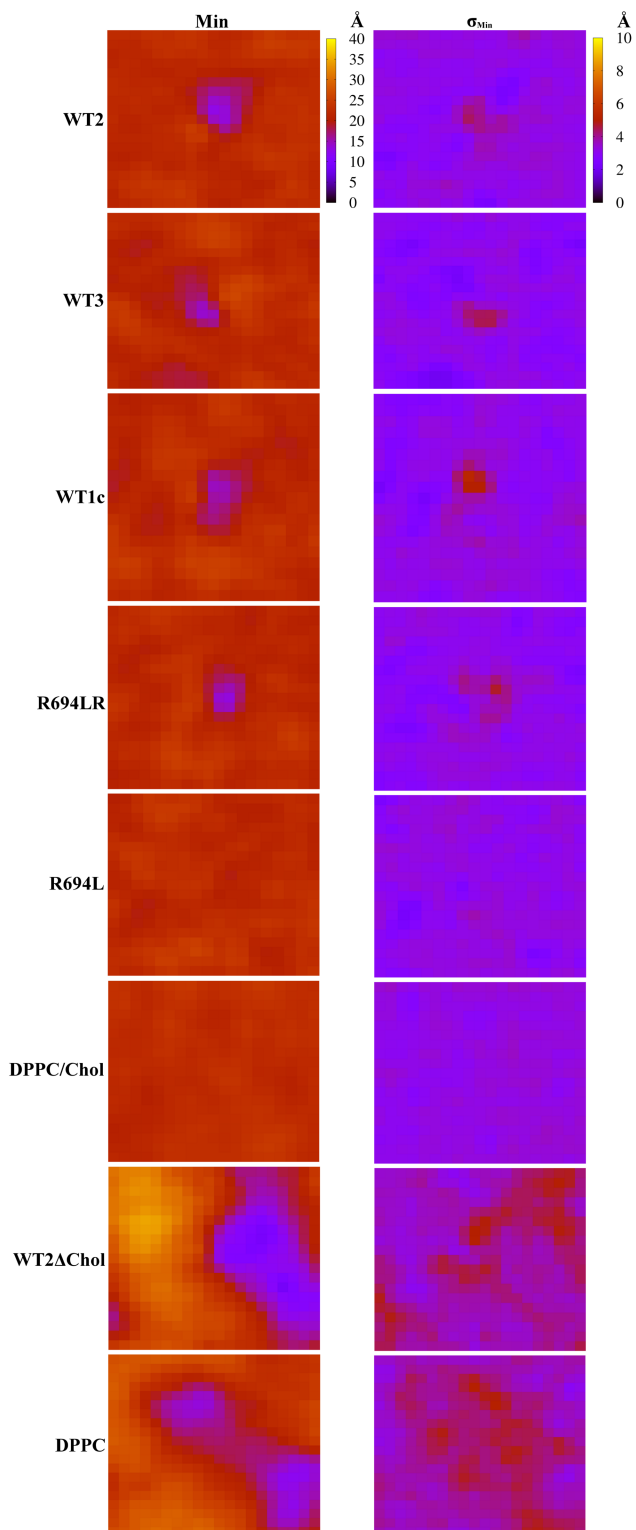

Figure 8: Maps of average minimum distance of water molecules along membrane normal in inner leaflet from global center of mass of lipid bilayer, Min (left column), in Å and standard deviation,  $\sigma_{\text{Min}}$ , (right column) in Å for WT2, WT3, WT1c, R694LR, R694L, DPPC/Chol, WT2ΔChol, and DPPC systems. All statistics are from the last 100 ns of each trajectory.
